# Supplementary material for: Development of carrageenan-based emulsion gel as a vehicle to transport xylo-oligosaccharides and its functional properties
Source: Royal Society of Chemistry journal article supplement (doi:10.1039/d5fo00172b), 2025-01-01
Supplement: d5fo00172b1.pdf [file d5fo00172b1.pdf]

### Supplementary Material

**Fig. S1** - Frequency sweep test for  $G'$  (A) and  $G''$  (B) at 4°C according to the formulations proposed in the experimental design.

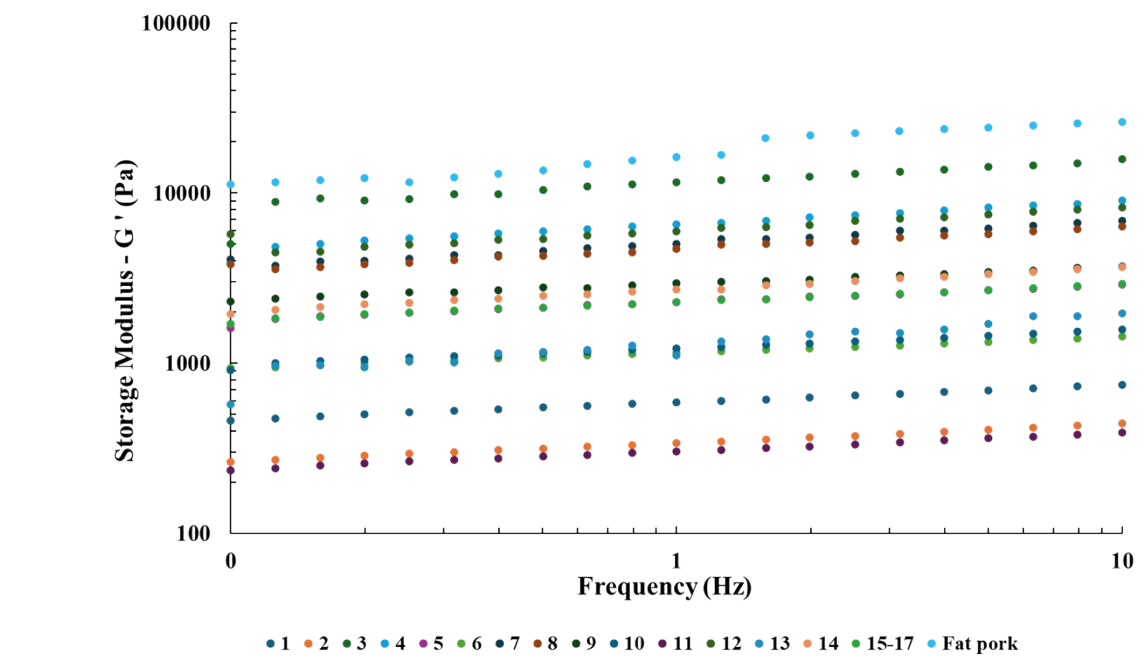

A)

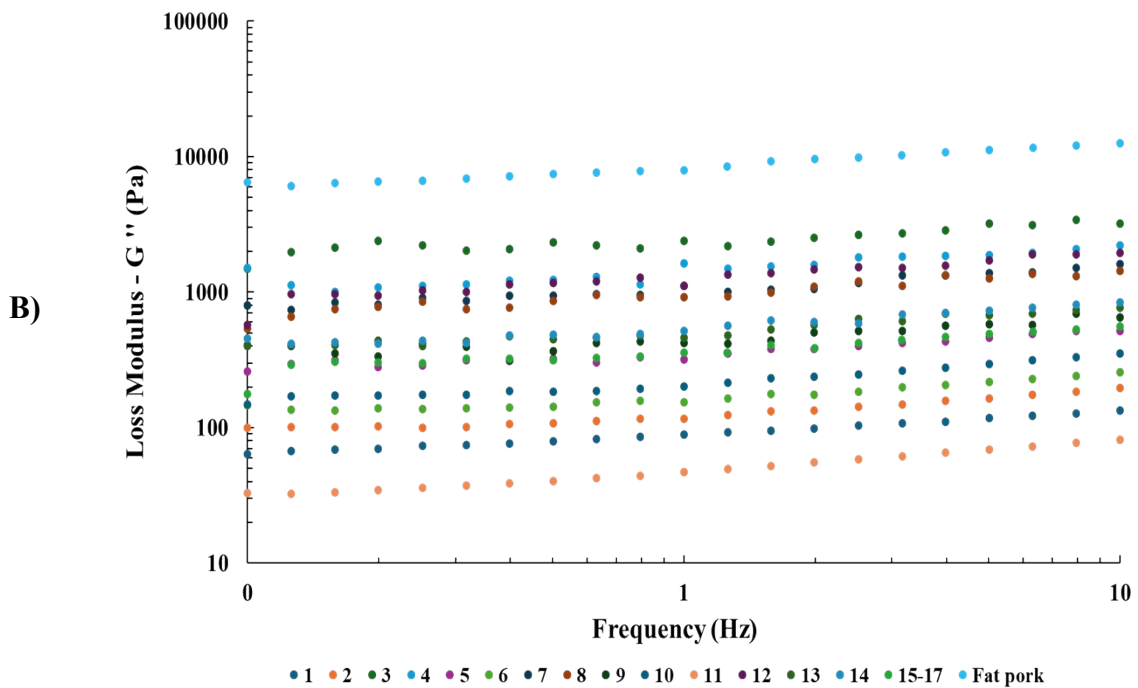

B)

### Model equations

$$\text{pH} = 4.60 + 0.22x_1 - 0.55x_3 + 0.26x_3^2 + 0.14x_1x_3 \quad (\text{S1})$$

$$G' = 2896.61 - 859.25 x_1 + 3251.48 x_2 + 1181.53 x_2^2 - 573.96 x_3 + 442.39 x_3^2 - 578.8 x_2 x_3 - 1415.10 x_2 x_3 \quad (\text{S2})$$

$$G'' = 666.10 - 123.30 x_1 + 770.35 x_2 + 294.36 x_2^2 - 129.78 x_3 - 328.04 x_2 x_3 \quad (\text{S3})$$

Where  $x_1$  is the encoded value for the SPI variable,  $x_2$  is the encoded value for the CAR variable, and  $x_3$  is the encoded value for the XOS variable
